# Supplementary material for: Influence of the number of topologically interacting neighbors on swarm dynamics
Source: PubMed Central journal article supplement — Sci Rep. 2014 Feb 25;4:4184. doi: 10.1038/srep04184 (PMC3933906; doi:10.1038/srep04184), 2014-02-25
Supplement: srep04184-s1.pdf [file srep04184-s1.pdf]

## Supplementary Information:

### Influence of the number of topologically interacting neighbors on swarm dynamics

Yilun Shang<sup>1</sup> & Roland Bouffanais<sup>1</sup>

<sup>1</sup>*Singapore University of Technology and Design, 20 Dover Drive, Singapore 138682*

**Proof for Theorem A.** The proof will be divided into two parts. In part 1 we show the almost guaranteed consensus, while in part 2 we address the rate of convergence of consensus.

**Part 1.** In the framework of our study, the condition  $k \geq 1$  is always fulfilled as topologically interacting agents are considered. Since reaching consensus for the dynamical system governed by Eq. (3) is a monotone increasing property with respect to the number of edges of  $G(t)$  [1], it suffices to show the case  $k = 1$ .

Let  $\xi_{ij}(t)$  be a random variable representing the connection between agent  $i$  and agent  $j$  at time  $t$ . More specifically,  $P(\xi_{ij}(t) = 1) = k/(N - 1)$  and  $P(\xi_{ij}(t) = 0) = 1 - k/(N - 1)$  for all  $i, j \in \{1, \dots, N\}$  ( $i \neq j$ ) and  $t \geq 0$ . Let  $M \geq 1$  be an integer. By the law of large numbers, we have

$$\begin{aligned}
 & P\left(\sum_{m=1}^M \xi_{ij}(m) \leq \frac{Mk}{2(N-1)}\right) \\
 &= P\left(\frac{1}{M} \sum_{m=1}^M \xi_{ij}(m) - \frac{k}{N-1} \leq -\frac{k}{2(N-1)}\right) \\
 &\leq P\left(\left|\frac{1}{M} \sum_{m=1}^M \xi_{ij}(m) - \frac{k}{N-1}\right| \geq \frac{k}{2(N-1)}\right) \\
 &\leq \frac{4(N-1-k)}{Mk}.
 \end{aligned} \tag{1}$$

Hence, we obtain

$$\begin{aligned}
 & P\left(\bigcap_{i \neq j} \left\{ \sum_{m=1}^M \xi_{ij}(m) > \frac{Mk}{2(N-1)} \right\}\right) \\
 &= 1 - P\left(\bigcup_{i \neq j} \left\{ \sum_{m=1}^M \xi_{ij}(m) \leq \frac{Mk}{2(N-1)} \right\}\right) \\
 &\geq 1 - \frac{4N(N-1)(N-1-k)}{Mk},
 \end{aligned} \tag{2}$$

which tends to the unity as  $M \rightarrow \infty$ .

Now define a graph  $\tilde{G}$  of order  $N$  whose adjacency matrix  $(a_{ij})$  is given by

$$a_{ij} = \begin{cases} 1, & \int_0^\infty \xi_{ij}(t) dt = \infty; \\ 0, & \int_0^\infty \xi_{ij}(t) dt < \infty. \end{cases} \tag{3}$$

Note that  $\int_0^M \xi_{ij}(t) dt = \sum_{m=1}^M \xi_{ij}(m)$ . Thus, Eq. (2) implies that  $\tilde{G}$  is a completely connected digraph for almost all sequences  $G_1, G_2, \dots, G_m, \dots$ .

Fix any such sequence  $G_1, G_2, \dots, G_m, \dots$ , we will show that the consensus can be reached for the dynamical system governed by Eq. (3). Let  $\Phi(t) = [\phi_1(t), \dots, \phi_N(t)]^T$  be a rearrangement of the vector  $\Theta(t) = [\theta_1(t), \dots, \theta_N(t)]^T$  such that

$$\phi_1(t) \leq \phi_2(t) \leq \dots \leq \phi_N(t). \tag{4}$$

Note that this new vector still satisfies the governing equation for the dynamics of the system

$$\dot{\Phi}(t) = \frac{1}{k}(-L(t))\Phi(t) = -L(t)\Phi(t), \tag{5}$$

except that, now, the matrix  $L(t)$  is the result of some conjugation transform made by some permutation matrix at time  $t$ . To avoid introducing unnecessary new notations, it still appears as  $L(t)$  in Eq. (5). It is clear that  $\dot{\phi}_1(t) = \sum_j \xi_{1j}(\phi_j(t) - \phi_1(t)) \geq 0$  and  $\dot{\phi}_N(t) = \sum_j \xi_{Nj}(\phi_j(t) - \phi_N(t)) \leq 0$ . Recall from Eq. (4) that  $\phi_1(t) \leq \phi_N(t)$ . Therefore,  $\phi_1(t)$  and  $\phi_N(t)$  are monotonic and bounded functions. We hence obtain the existence of some  $\phi_1^*$  and  $\phi_N^*$  such that

$$\phi_1(t) \rightarrow \phi_1^* \quad \text{and} \quad \phi_N(t) \rightarrow \phi_N^*, \quad (6)$$

as  $t$  tends to infinity.

Define  $\Psi(t) = [\psi_1(t), \dots, \psi_N(t)]^T$  and recall that  $k = 1$ . Then, the  $k$ -nearest neighbor model entails that the outdegree of any vertex in  $G(t)$  is equal to 1. Hence, it is easy to see that there exists a diagonal matrix  $B$  with diagonal elements equal to 1 or  $-1$  such that

$$\Psi(t) = B\Phi(t), \quad (7)$$

and  $\dot{\psi}_i(t) \geq 0$  for all  $i$ . Since  $\psi_i(t) \leq |\phi_N(0)|$  (i.e., bounded),  $\psi_i(t)$  converges for all  $i$ . It follows from (7) that  $\phi_i(t)$  also converges. We write

$$\Phi(t) \rightarrow \Phi^* = [\phi_1^*, \dots, \phi_N^*]^T. \quad (8)$$

Next, we claim that  $\theta_i(t)$  converges for  $i = 1, \dots, N$ . This can be shown as follows. Note that there exists an  $\varepsilon_0 > 0$ , such that for any  $\varepsilon < \varepsilon_0$ , any pair of intervals in the family  $\{(\phi_i^* - \varepsilon, \phi_i^* + \varepsilon)\}_{i=1}^N$  is either coincident or disjoint. For such  $\varepsilon$ , there exists  $T > 0$  such that for  $t > T$ ,

$$\{\theta_i(t)\}_{i=1}^N = \{\phi_i(t)\}_{i=1}^N \in \cup_{i=1}^N (\phi_i^* - \varepsilon, \phi_i^* + \varepsilon), \quad (9)$$

by invoking (8). Since  $\theta_i(t)$  is continuous, for any  $t_1, t_2 > T$  we obtain  $|\theta_i(t_1) - \theta_i(t_2)| < 2\varepsilon$ . Therefore, by the Cauchy convergence criterion we have

$$\Theta(t) \rightarrow \Theta^* = [\theta_1^*, \dots, \theta_N^*]^T, \quad (10)$$

for some  $\theta_i^*$  ( $i = 1, \dots, N$ ).

Finally, we need to show that all the above  $\theta_i^*$  are equal. From Eq. (3) we have

$$\dot{\theta}_i = \sum_{j=1}^N \xi_{ij}(\theta_j - \theta_i). \quad (11)$$

In the following, we will use the method of proof by contradiction. Without loss of generality, we assume that

$$\theta_{j_0}^* > \theta_{i_0}^*. \quad (12)$$

Then there exists some  $T > 0$  such that

$$\theta_{j_0}(t) - \theta_{i_0}(t) \geq \frac{\theta_{j_0}^* - \theta_{i_0}^*}{2} := \delta > 0, \quad (13)$$

holds for any  $t > T$ . Using Eqs. (11) and (13) we obtain

$$\begin{aligned} \int_T^\infty \xi_{i_0 j_0} dt &\leq \frac{1}{\delta} \int_T^\infty \xi_{i_0 j_0} (\theta_{j_0} - \theta_{i_0}) dt \\ &= \frac{1}{\delta} \int_T^\infty \dot{\theta}_{i_0} dt \\ &= \frac{\theta_{i_0}^* - \theta_{i_0}(T)}{\delta}. \end{aligned} \quad (14)$$

It then follows from the definition (3) that  $a_{i_0 j_0} = 0$ , and hence  $\{i_0, j_0\}$  is not an edge in  $\tilde{G}$ . This yields a contradiction since we know that  $\tilde{G}$  is a complete digraph. Therefore, we have  $\theta_1^* = \dots = \theta_N^*$ , which is the final consensus value for all the agents.

**Part 2.** To determine the rate of convergence, we will look at the system via a Lyapunov function's point of view [2, 3]. Define the agreement subspace as

$$\text{span}\{\mathbf{1}\} := \{x = (x_1, \dots, x_N) \in \mathbb{R}^N \mid x_i = x_j \text{ for all } i, j\}, \quad (15)$$

where  $\mathbf{1} = (1, \dots, 1)^T \in \mathbb{R}^N$ .

For  $t \in [m-1, m)$ , rewrite  $L_m := L(t)$ , which is the Laplacian of the digraph  $G_m$ . The trajectory of (3) can be viewed as [4, 5]

$$\Theta(m+1) = e^{-\frac{1}{k}L_m} \Theta(m), \quad m = 0, 1, 2, \dots \quad (16)$$

Let  $\{\Theta^\perp(m)\}_{m \geq 1}$  be the projection of  $\{\Theta(m)\}_{m \geq 1}$  on the subspace  $(\text{span}\{\mathbf{1}\})^\perp$  orthogonal to the agreement subspace  $\text{span}\{\mathbf{1}\}$ . Hence,  $\Theta^\perp(m)^T \mathbf{1} = 0$ . We aim to estimate the convergence rate of  $\Theta^\perp(m)^T \Theta^\perp(m) \rightarrow 0$ , as  $m$  tends to infinity.

Let us define the Lyapunov function as

$$V(\Theta^\perp(m)) = \frac{1}{N} \Theta^\perp(m)^T \hat{L} \Theta^\perp(m), \quad (17)$$

where  $\hat{L} = NI_N - \mathbf{1}\mathbf{1}^T$ ,  $I_N$  being the  $N$ -dimensional identity matrix. Using Eqs. (16) and (17), we obtain

$$\begin{aligned} & E [V(\Theta^\perp(m+1)) - V(\Theta^\perp(m)) \mid \Theta^\perp(m)] \\ &= \frac{1}{N} E [\Theta^\perp(m)^T e^{-\frac{1}{k}L_m^T} \hat{L} e^{-\frac{1}{k}L_m} \Theta^\perp(m) \\ &\quad - \Theta^\perp(m)^T \hat{L} \Theta^\perp(m) \mid \Theta^\perp(m)] \\ &= E \left[ \Theta^\perp(m)^T e^{-\frac{1}{k}(L_m^T + L_m)} \Theta^\perp(m) \right. \\ &\quad - \frac{1}{N} \Theta^\perp(m)^T (e^{-\frac{1}{k}L_m^T} \mathbf{1})(e^{-\frac{1}{k}L_m} \mathbf{1})^T \Theta^\perp(m) \\ &\quad - \Theta^\perp(m)^T \Theta^\perp(m) \\ &\quad \left. + \frac{1}{N} \Theta^\perp(m)^T \mathbf{1}\mathbf{1}^T \Theta^\perp(m) \mid \Theta^\perp(m) \right] \\ &= \Theta^\perp(m)^T E \left[ e^{-\frac{1}{k}(L_m^T + L_m)} - \frac{1}{N} \left\| e^{-\frac{1}{k}L_m} \mathbf{1} \right\|^2 I_N - I_N \right] \\ &\quad \cdot \Theta^\perp(m), \end{aligned} \quad (18)$$

where in the last equation above we used the property  $\Theta^\perp(m)^T \mathbf{1} = 0$ .

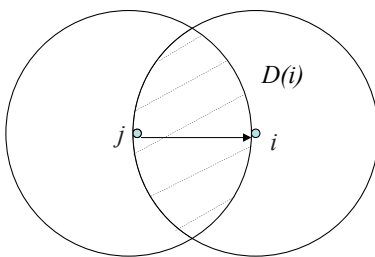

FIG. 1. An illustration that node  $i$  belongs to the set of  $k$ -nearest neighbors of node  $j$ .  $D(i)$  is the disk of radius  $ij$  center at  $i$ .

We claim that almost all graphs in  $G(N, k)$  have balanced induced subgraphs [2] when  $k \geq 3$  and  $N$  is large. Indeed, we note that the probability that  $G \in G(N, k)$  contains a balanced induced subgraph is lower bounded by the probability that  $G$  contains a bidirectional edge. The latter one can be estimated as follows. For any node  $j \in G$ , we can pick a node  $i$  such that  $\{j, i\}$  is an edge in  $G$  starting from  $j$  ending at  $i$ . In other words,  $i$  belongs to the set of  $k$ -nearest neighbors of  $j$ . Since the area of shaded region constitutes more than one-third of the area of the disk  $D(i)$  (see Fig. 1), we conclude that, on average, there will be at least 3 nodes within the disk  $D(i)$  when  $N$  is large.

Therefore,  $\{i, j\}$  must be an edge when  $k \geq 3$  and thus  $\{i, j\}$  and  $\{j, i\}$  form a bidirectional edge in  $G$ . We have  $P(G \text{ contains a balanced induced subgraph}) \geq P(G \text{ contains a bidirectional edge}) = 1$ .

Note that  $L_m^T + L_m$  is symmetric and hence has real eigenvalues. First, we assume that  $G_m$  itself is balanced. We have  $L_m^T \mathbf{1} = 0$  and  $L_m^T + L_m$  can be viewed as the Laplacian for the disoriented version of the digraph  $G_m$  [1, 6]. We know that the spectrum of  $e^{-\frac{1}{k}(L_m^T + L_m)}$  can be ordered as

$$\begin{aligned} e^{-\frac{1}{k}\lambda_N(L_m^T + L_m)} &\leq e^{-\frac{1}{k}\lambda_{N-1}(L_m^T + L_m)} \leq \dots \\ &\leq e^{-\frac{1}{k}\lambda_2(L_m^T + L_m)} \leq 1. \end{aligned} \quad (19)$$

The vector  $\mathbf{1}$  is the eigenvector corresponding to the largest eigenvalue 1 of the matrix exponential  $e^{-\frac{1}{k}(L_m^T + L_m)}$  (This can easily be seen by expanding the matrix exponential [7]). Noting that  $e^{-\frac{1}{k}L_m^T} \mathbf{1} = 0$  and applying the Courant–Fischer theorem to (18), we obtain

$$\begin{aligned} &E [V(\Theta^\perp(m+1)) - V(\Theta^\perp(m)) | \Theta^\perp(m)] \\ &\leq \left( \lambda_{N-1} \left( E[e^{-\frac{1}{k}(L_m^T + L_m)}] \right) - 1 \right) \\ &\quad \cdot \Theta^\perp(m)^T \Theta^\perp(m). \end{aligned} \quad (20)$$

Let  $R(N, k)$  be the cardinality of the set of  $k$ -nearest neighbor digraphs on  $N$  vertices,  $L^{(i)}$  be the Laplacian matrix associated with the  $i$ -th graph in this set, and  $p^{(i)}$  be the probability that the  $i$ -th graph appears in the  $G(N, k)$  model. Using the Courant–Fischer theorem again gives

$$\begin{aligned} &\lambda_{N-1} \left( E[e^{-\frac{1}{k}(L_m^T + L_m)}] \right) \\ &= \max_{\substack{\|\Theta\|=1 \\ \Theta \perp \mathbf{1}}} \sum_{i=1}^{R(N, k)} p^{(i)} \Theta^T e^{-\frac{1}{k}(L^{(i)T} + L^{(i)})} \Theta \\ &\leq E \left[ e^{-\frac{1}{k}\lambda_2(L_m^T + L_m)} \right]. \end{aligned} \quad (21)$$

If the disoriented version of  $G_m$  is connected, we have  $0 < e^{-\frac{1}{k}\lambda_2(L_m^T + L_m)} < 1$ ; otherwise, we have  $e^{-\frac{1}{k}\lambda_2(L_m^T + L_m)} = 1$ . Hence

$$0 < E \left[ e^{-\frac{1}{k}\lambda_2(L_m^T + L_m)} \right] < 1. \quad (22)$$

Combining (20) and (21), we get

$$\begin{aligned} &E [V(\Theta^\perp(m+1)) - V(\Theta^\perp(m)) | \Theta^\perp(m)] \\ &\leq \left( E \left[ e^{-\frac{1}{k}\lambda_2(L_m^T + L_m)} \right] - 1 \right) \|\Theta^\perp(m)\|^2. \end{aligned} \quad (23)$$

By using the Markov inequality and (23), we obtain for any  $\varepsilon > 0$ ,

$$\begin{aligned} &P \left( \sup_{m \geq M} \Theta^\perp(m)^T \Theta^\perp(m) \geq \varepsilon \right) \\ &\leq \frac{\left( E \left[ e^{-\frac{1}{k}\lambda_2(L_m^T + L_m)} \right] \right)^M}{\varepsilon} \Theta^\perp(0)^T \Theta^\perp(0). \end{aligned} \quad (24)$$

In view of (22) and (24), we obtain that the rate of convergence is dictated by the quantity  $E \left[ e^{-\frac{1}{k}\lambda_2(L^T + L)} \right]$ .

When  $G_m$  is not balanced,  $\mathbf{1}$  is not the eigenvector corresponding to the largest eigenvalue 1 of the matrix exponential  $e^{-\frac{1}{k}(L_m^T + L_m)}$ . Similarly as in (20), by applying the Courant–Fischer theorem to (18) we now get

$$\begin{aligned} &E [V(\Theta^\perp(m+1)) - V(\Theta^\perp(m)) | \Theta^\perp(m)] \\ &\leq \left( \lambda_N \left( E[e^{-\frac{1}{k}(L_m^T + L_m)}] \right) - E \left\| e^{-\frac{1}{k}L_m^T} \mathbf{1} \right\|^2 - 1 \right) \\ &\quad \cdot \Theta^\perp(m)^T \Theta^\perp(m). \end{aligned} \quad (25)$$

Arguing as in (21) and using the interlacing theorem [8], we have

$$\begin{aligned}
0 &< \lambda_N \left( E \left[ e^{-\frac{1}{k}(L_m^T + L_m)} \right] \right) \\
&= \max_{\|\Theta\|=1} \sum_{i=1}^{R(N,k)} p^{(i)} \Theta^T e^{-\frac{1}{k}(L^{(i)T} + L^{(i)})} \Theta \\
&\leq E \left[ e^{-\frac{1}{k} \lambda_1(L_m^T + L_m)} \right] \\
&\leq E \left[ e^{-\frac{1}{k} \mu_1(L_m^T + L_m)} \right] = 1,
\end{aligned} \tag{26}$$

where  $\mu_1(L_m^T + L_m)$  represents the smallest eigenvalue of the Laplacian matrix for the disoriented version of  $\hat{G}_m$ , and  $\hat{G}_m$  is a balanced induced subgraph of  $G_m$ .

On the other hand, by directly expanding the matrix exponential and noting that  $N > k$ , we have  $0 < \left\| e^{-\frac{1}{k} L_m^T} \mathbf{1} \right\|^2 < 1$ . Therefore, arguing as in (24) we obtain for any  $\varepsilon > 0$ ,

$$\begin{aligned}
&P \left( \sup_{m \geq M} \Theta^\perp(m)^T \Theta^\perp(m) \geq \varepsilon \right) \\
&\leq \frac{\left( 1 - E \left\| e^{-\frac{1}{k} L_m^T} \mathbf{1} \right\|^2 \right)^M}{\varepsilon} \Theta^\perp(0)^T \Theta^\perp(0).
\end{aligned} \tag{27}$$

Combining (24) and (27), we conclude that the rate of convergence to consensus is dictated by the quantity  $\nu = \max \left\{ E \left[ e^{-\frac{1}{k} \lambda_2(L^T + L)} \right], 1 - E \left\| e^{-\frac{1}{k} L^T} \mathbf{1} \right\|^2 \right\}$ .  $\square$

**Proof for Corollary B.** It suffices to show that  $\nu(k) > \nu(k+1)$  for all  $k$ . For  $i \geq 0$  and  $k < N$ , a straightforward calculation shows that

$$\left( -\frac{1}{k} L^T \right)^i \mathbf{1} \prec \left( -\frac{1}{k+1} L^T \right)^i \mathbf{1}, \tag{28}$$

where  $\prec$  means ‘‘entry-wise less than’’. Hence, we obtain

$$1 - E \left\| e^{-\frac{1}{k} L^T} \mathbf{1} \right\|^2 > 1 - E \left\| e^{-\frac{1}{k+1} L^T} \mathbf{1} \right\|^2. \tag{29}$$

We rewrite the graph Laplacian  $L$  as  $L^{k,N}$  to stress the dependence on both  $k$  and  $N$ . We claim that for all  $N \geq 3$ , the following holds:

$$\frac{k+1}{k} < \frac{\lambda_2((L^{k+1,N})^T + L^{k+1,N})}{\lambda_2((L^{k,N})^T + L^{k,N})}. \tag{30}$$

From Eq. (30), we know that

$$\begin{aligned}
E \left[ e^{-\frac{1}{k} \lambda_2((L^{k,N})^T + L^{k,N})} \right] \\
> E \left[ e^{-\frac{1}{k+1} \lambda_2((L^{k+1,N})^T + L^{k+1,N})} \right],
\end{aligned} \tag{31}$$

which together with Eq. (29) yields the desired result, namely  $\nu(k) > \nu(k+1)$ .

It remains to show the claim (30). This can be shown by induction on  $N$ . Suppose Eq. (30) holds for  $N$ , and we will show it holds for  $N+1$  (the fact that it holds for any finite  $N$  can be very easily be tested numerically as is shown below). Since the second smallest Laplacian eigenvalue of a star graph  $S$  is zero, we obtain

$$\lambda_2((L^{k+1,N})^T + L^{k+1,N}) \leq \lambda_2((L^{k+1,N+1})^T + L^{k+1,N}),$$

by working analogously to Property 3.1 in [9]. Similarly, we obtain

$$\lambda_2((L^{k,N})^T + L^{k,N}) \geq \lambda_2((L^{k,N+1})^T + L^{k,N}) - 1/n,$$

by using an argument similar to the one used in Property 3.3 [9]. Therefore, by using Eq. (30) we have

$$\begin{aligned} \frac{k+1}{k} &< \frac{\lambda_2((L^{k+1,N})^T + L^{k+1,N})}{\lambda_2((L^{k,N})^T + L^{k,N})} \\ &\leq \frac{\lambda_2((L^{k+1,N+1})^T + L^{k+1,N+1})}{\lambda_2((L^{k,N+1})^T + L^{k,N+1}) - \frac{1}{N}}. \end{aligned} \quad (32)$$

When  $N$  is large enough, we get from Eq. (32)

$$\frac{k+1}{k} < \frac{\lambda_2((L^{k+1,N+1})^T + L^{k+1,N+1})}{\lambda_2((L^{k,N+1})^T + L^{k,N+1})}, \quad (33)$$

which concludes the induction step.  $\square$

### Continuous-time Markovian Process.

Formally, the random network  $G(t)$  in (1) switches among  $m$  topologies  $G_1, \dots, G_m$  in  $G(N, k)$ , and  $G(t) = G_i$  if and only if the switching signal  $s(t) = i \in \mathcal{M} := \{1, \dots, m\}$ . The random process  $\{s(t), t \geq 0\}$  is ruled by a Markov process with state space  $\mathcal{M}$  and infinitesimal generator  $\Gamma = (\gamma_{ij})$  given by

$$\mathbb{P}(s(t+h) = j | s(t) = i) = \begin{cases} \gamma_{ij}h + o(h), & \text{when } s(t) \text{ jumps from } i \text{ to } j, \\ 1 + \gamma_{ii}h + o(h), & \text{otherwise.} \end{cases}$$

Here,  $\mathbb{P}$  is the probability measure of interest,  $\gamma_{ij}$  is the transition rate from state  $i$  to state  $j$  with  $\gamma_{ij} \geq 0$  if  $i \neq j$ ,  $\gamma_{ii} = -\sum_{j \neq i} \gamma_{ij}$ , and  $o(h)$  represents an infinitesimal of higher order than  $h$ . For practical implementation, we may set  $\gamma_{ij}$  large (thus more likely) if  $G_i$  and  $G_j$  differ only locally, while set  $\gamma_{ij}$  small (thus less likely) if  $G_i$  and  $G_j$  widely differ.

- 
- [1] Ren, W. & Beard, R. Consensus seeking in multiagent systems under dynamically changing interaction topologies. *IEEE Trans. Autom. Control* **50**, 655–661 (2005).
- [2] Olfati-Saber, R. & Murray, R. M. Consensus problems in networks of agents with switching topology and time-delays. *IEEE Trans. Autom. Control* **49**, 1520–1533 (2004).
- [3] Bertsekas, D. & Tsitsiklis, J. *Parallel and Distributed Computation* (Prentice-Hall, 1989).
- [4] Jadbabaie, A., Lin, J. & Morse, A. S. Coordination of groups of mobile autonomous agents using nearest neighbor rules. *IEEE Trans. Autom. Contr.* **48**, 988–1001 (2003).
- [5] Seneta, E. *Non-negative Matrices and Markov Chains* (Springer, 2006).
- [6] Agaev, R. & Chebotarev, P. On the spectra of nonsymmetric Laplacian matrices. *Linear Algebra Appl.* **399**, 157–168 (2005).
- [7] Meyer, C. *Matrix Analysis and Applied Linear Algebra* (SIAM, 2001).
- [8] Wu, B., Shao, J. & Yuan, X. Deleting vertices and interlacing Laplacian eigenvalues. *Chinese Ann. Math. B* **31**, 231–239 (2010).
- [9] Fiedler, M. Algebraic connectivity of graphs. *Czech. Math. J.* **23**, 298–305 (1973).
